# Supplementary material
Source: PubMed Central journal article supplement (PMC6020169)
Supplement: NIHMS935695-supplement-supplement_1.pdf [file NIHMS935695-supplement-supplement_1.pdf]

## 7 Supplemental Material

| Scenario | OR  | Chi   | RR   | Gini   | Youden's | Kappa |
|----------|-----|-------|------|--------|----------|-------|
| 1        | 1.5 | 0.38  | 1.36 | 0.3187 | 0.021    | 0.029 |
| 2        | 1.5 | 0.49  | 1.25 | 0.478  | 0.019    | 0.023 |
| 3        | 1.5 | 1.20  | 1.37 | 0.318  | 0.069    | 0.069 |
| 4        | 1.5 | 1.63  | 1.26 | 0.478  | 0.066    | 0.072 |
| 5        | 1.5 | 1.62  | 1.38 | 0.318  | 0.100    | 0.064 |
| 6        | 1.5 | 2.44  | 1.27 | 0.478  | 0.101    | 0.096 |
| 7        | 3.0 | 3.67  | 2.17 | 0.318  | 0.066    | 0.091 |
| 8        | 3.0 | 3.53  | 1.69 | 0.478  | 0.052    | 0.062 |
| 9        | 3.0 | 10.32 | 2.27 | 0.318  | 0.203    | 0.203 |
| 10       | 3.0 | 11.92 | 1.77 | 0.478  | 0.178    | 0.194 |
| 11       | 3.0 | 10.89 | 2.43 | 0.318  | 0.260    | 0.167 |
| 12       | 3.0 | 17.12 | 1.94 | 0.478  | 0.267    | 0.256 |
| 13       | 6.0 | 11.21 | 3.15 | 0.318  | 0.115    | 0.160 |
| 14       | 6.0 | 8.16  | 2.07 | 0.478  | 0.080    | 0.094 |
| 15       | 6.0 | 29.60 | 3.62 | 0.318  | 0.344    | 0.344 |
| 16       | 6.0 | 29.24 | 2.32 | 0.478  | 0.279    | 0.304 |
| 17       | 6.0 | 24.62 | 4.37 | 0.318  | 0.392    | 0.251 |
| 18       | 6.0 | 41.66 | 3.00 | 0.478  | 0.416    | 0.400 |

Table S1: Specific parameter values for each method given the different scenarios in a case-control setting for sample size of 250.

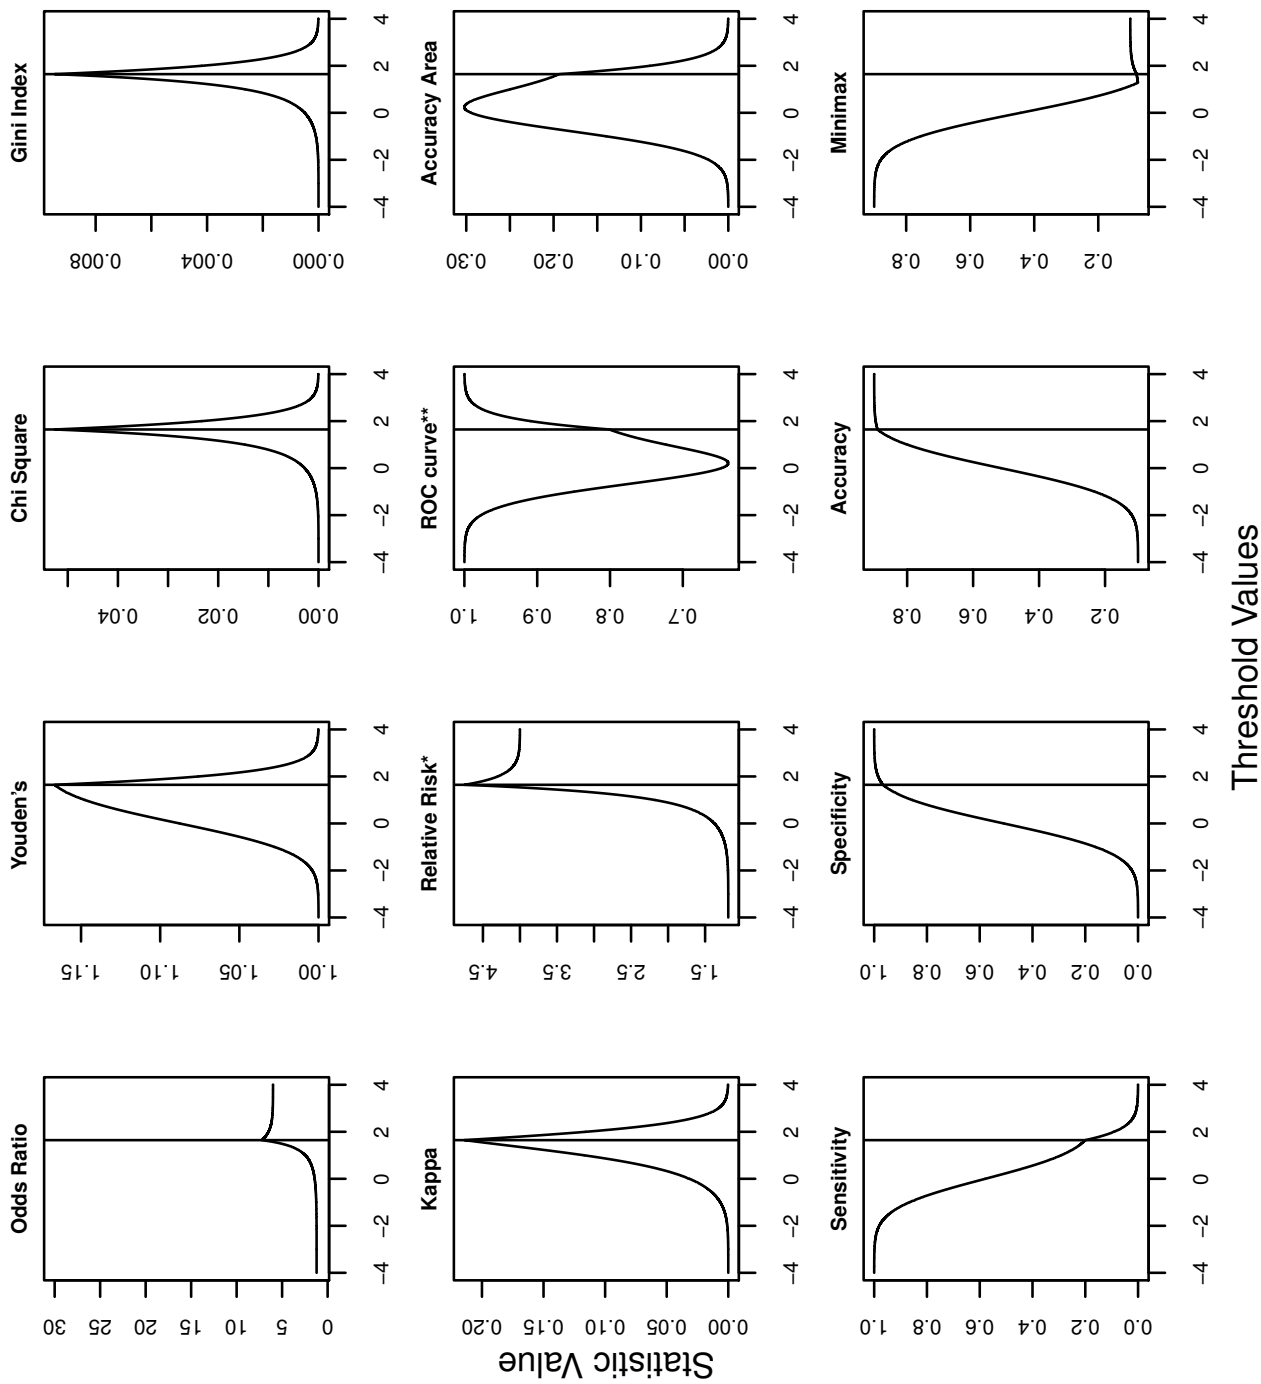

\*For cohort study only

\*\*Distance from ROC curve to point (0,1)

Figure S1: Statistic Maximums

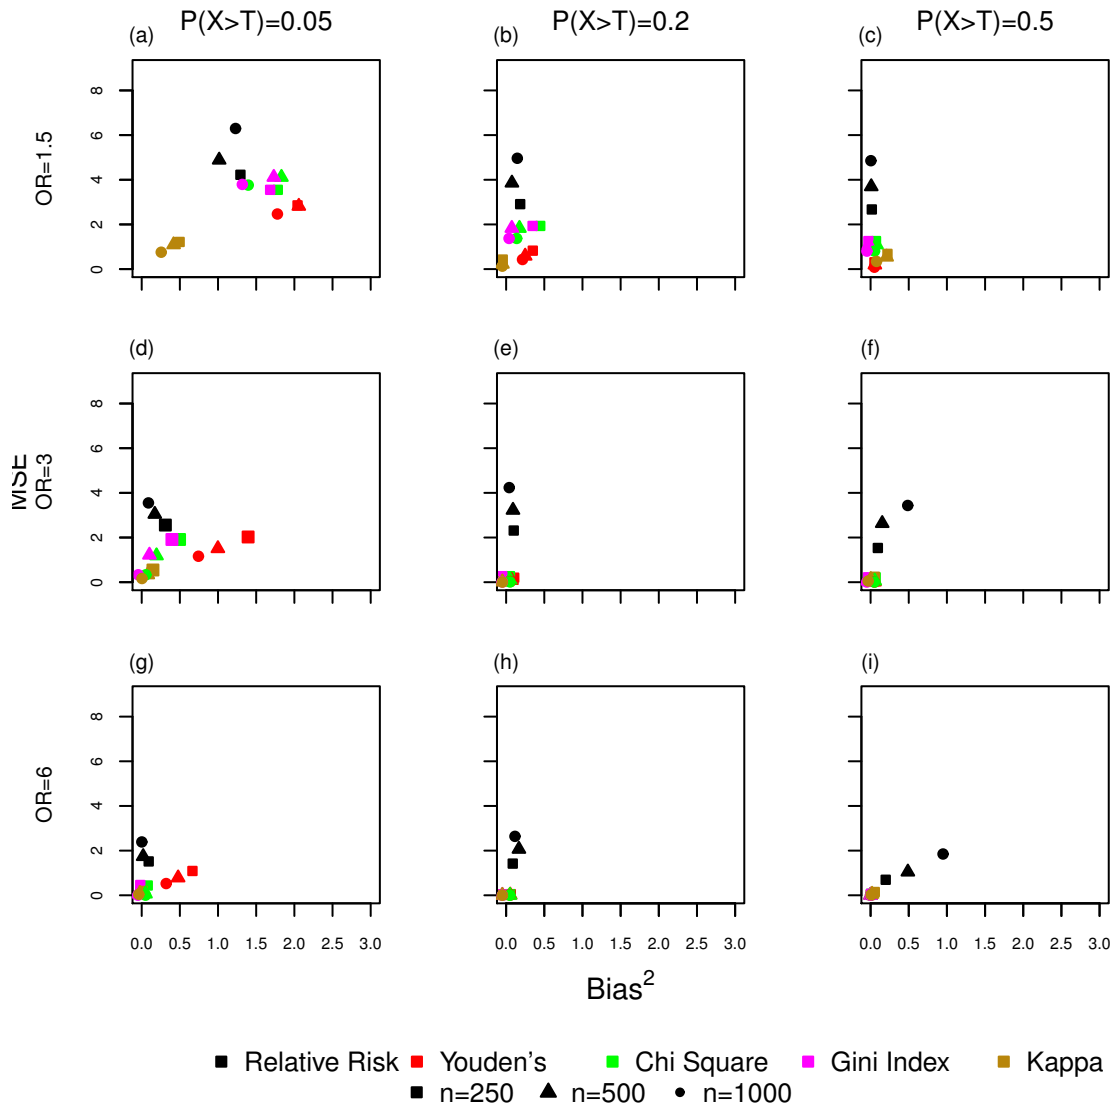

Figure S2: Simulation results showing mean-squared error (MSE) by Bias<sup>2</sup> under the cohort study design for the estimated threshold obtained by maximizing the statistics: odds ratio, Youden's, chi-square, Gini Index, and kappa. Rows represent strength of association between  $X$  and  $Y$  and columns represent the probability that the independent variable  $X$  is greater than the true threshold  $T$ .

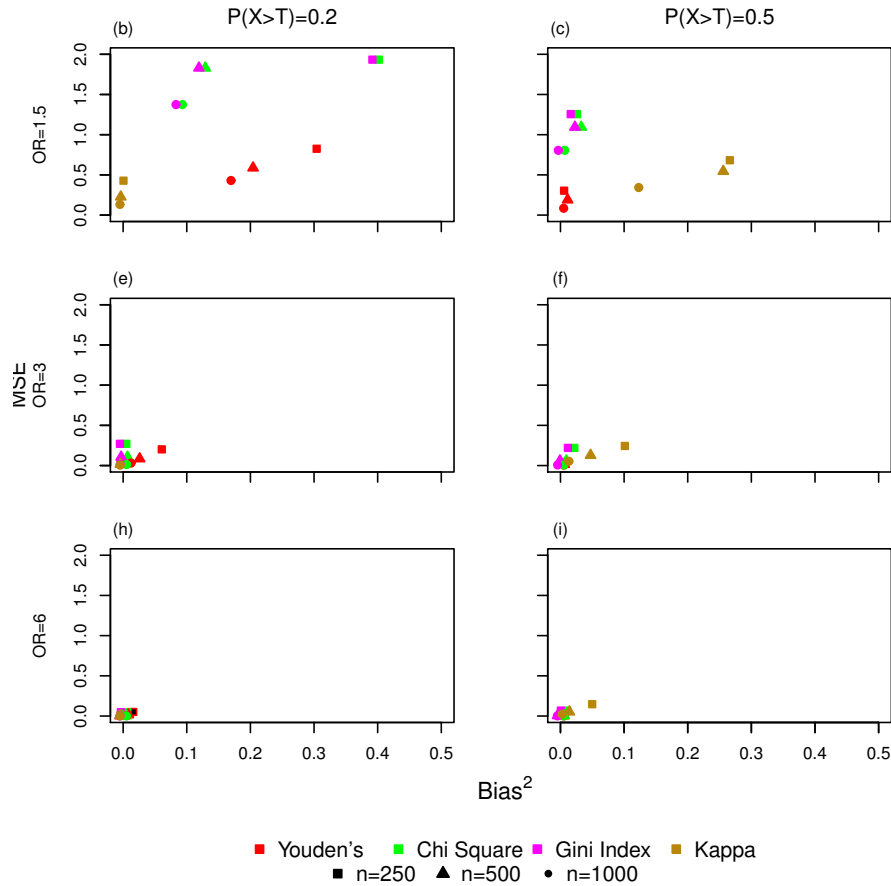

Figure S3: Simulation results showing mean-squared error (MSE) by  $\text{Bias}^2$  under the cohort study design for the estimated threshold obtained by maximizing the statistics: Youden's, chi-square, Gini Index, and kappa, excluding  $P(X \geq T)=0.05$ . Rows represent strength of association between  $X$  and  $Y$  and columns represent the probability that the independent variable  $X$  is greater than the true threshold  $T$ .

## References

- Alvarez-Garcia, G., Collantes-Fernandez, E., Costas, E., Rebordosa, X., and Ortega-Mora, L. (2003). Influence of age and purpose for testing on the cut-off selection of serological methods in bovine neosporosis. *Veterinary Research, BioMed Central*, 34(3):341–352.
- Aoki, K., Misumi, J., Kimura, T., Zhao, W., and Xie, T. (1997). Evaluation of cutoff levels for screening of gastric cancer using serum pepsinogens and distributions of levels of serum pepsinogen i, ii and of pg i / pg ii ratios in a gastric cancer case-control study. *Journal of Epidemiology*, 7(3):143–151.
- Boehning, D., Holling, H., and Patilea, V. (2011). A limitation of the diagnostic-odds ratio in determining an
